# Supplementary material
Source: Springer Nature journal article supplement (https://www.springermedizin.de/resource/supplementary/12936_2007_467_MOESM6_ESM.pdf/9547512)

a)

- DEMETER median    ▲ Log Malaria    ○ Weather Station

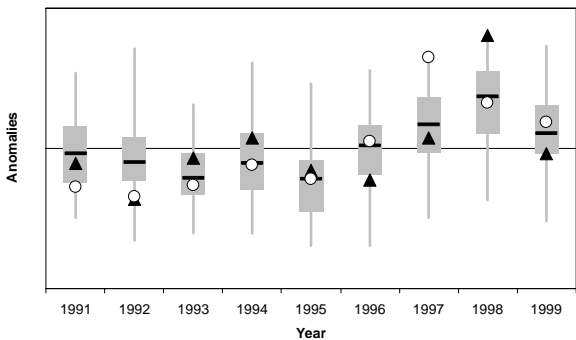

b)

- DEMETER median    ▲ Log Malaria    ○ Weather Station

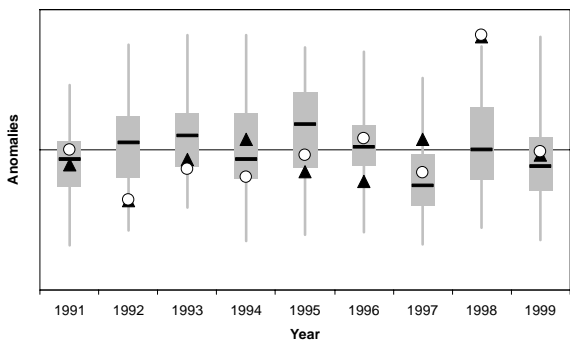

c)

- DEMETER median    ▲ Log Malaria    ○ Weather Station

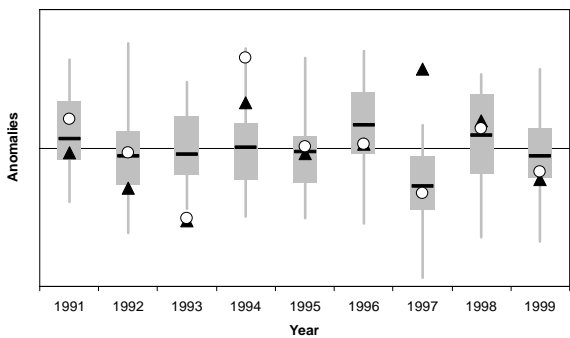

d)

- DEMETER median    ▲ Log Malaria    ○ Weather Station

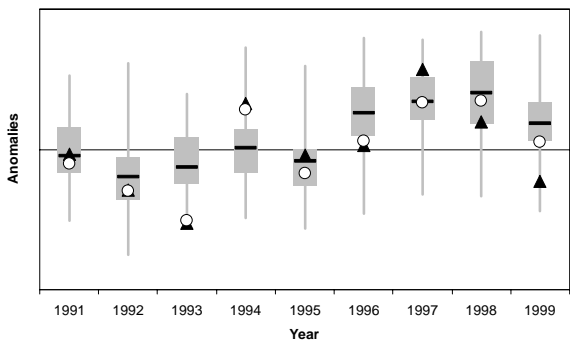

Supplement: MOESM6 [file 9547512]
